# Supplementary material for: A Study of the Wound Healing Mechanism of a Traditional Chinese Medicine,Angelica sinensis, Using a Proteomic Approach
Source: Hindawi journal article supplement (doi:10.1155/2012/467531), 2012-01-01

Supplementary Fig.1

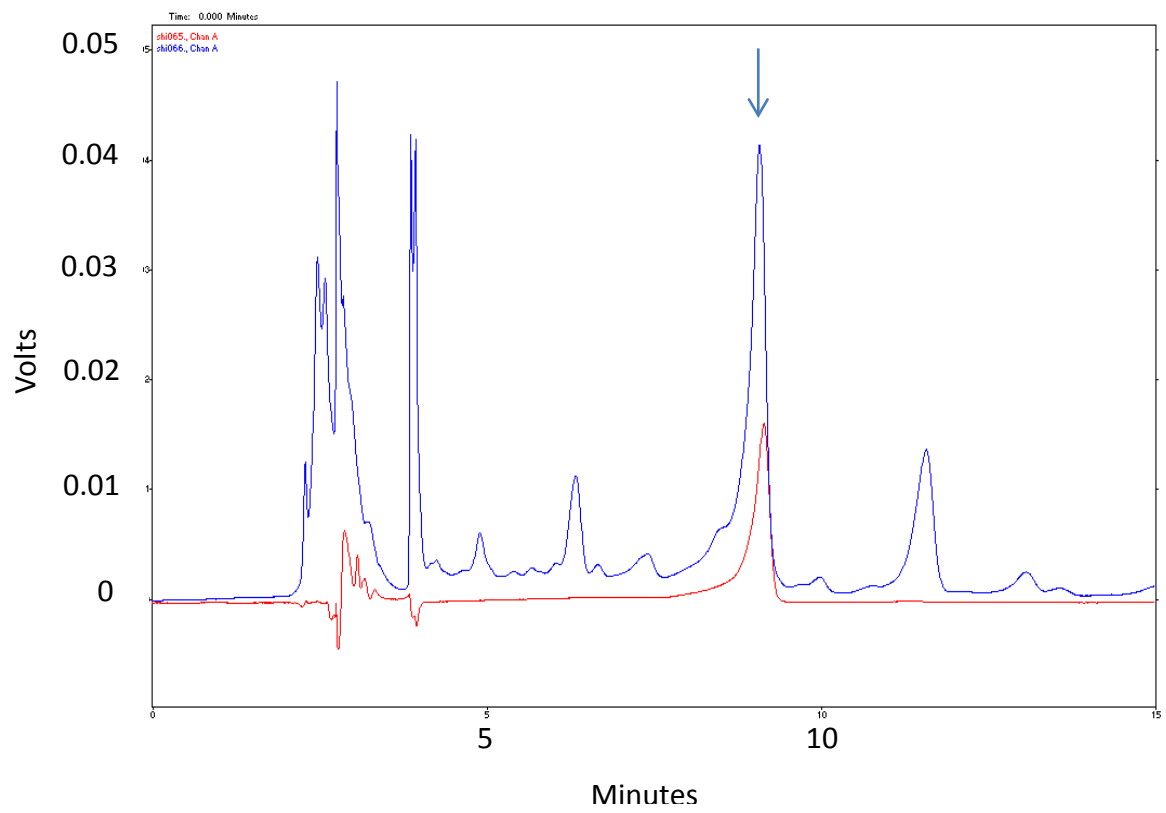

Fig.2

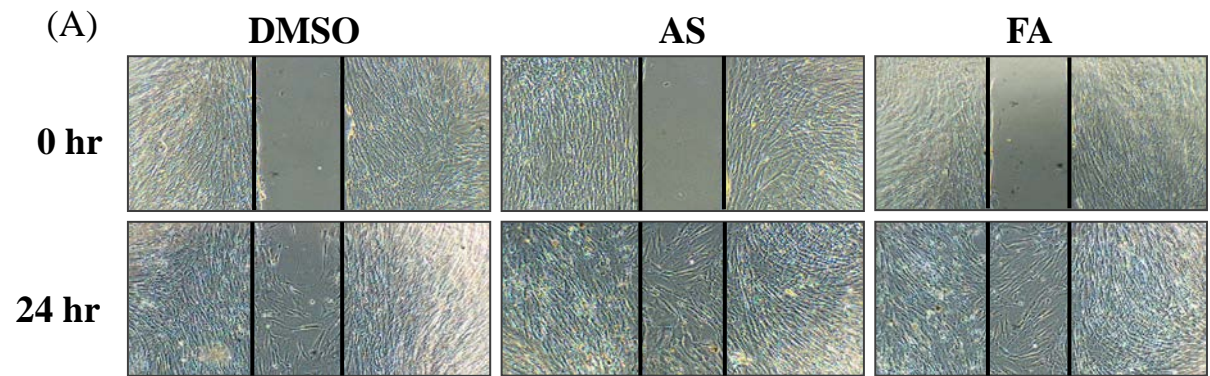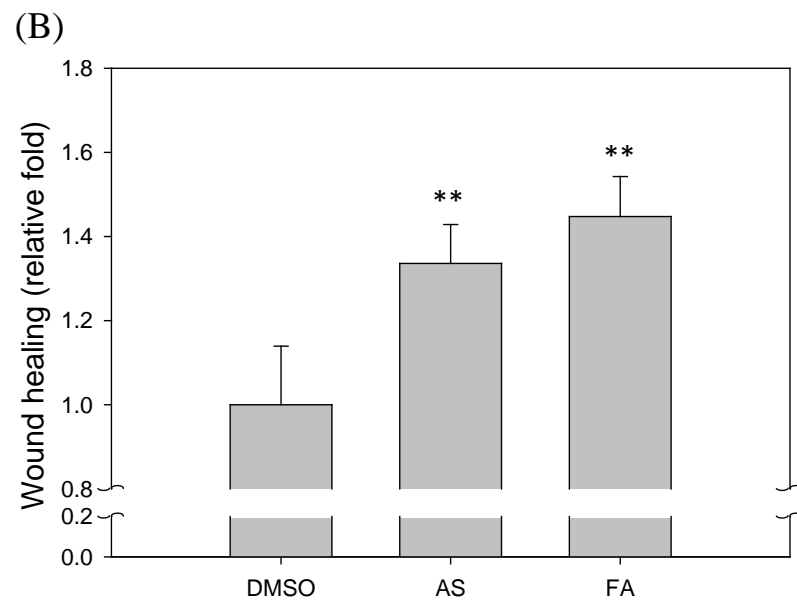

Supplement: f1 [file 467531.f1.pdf]
